# Supplementary material for: The Relationship between Different Amounts of Physical Exercise, Internal Inhibition, and Drug Craving in Individuals with Substance-Use Disorders
Source: MDPI journal article supplement (doi:10.3390/ijerph182312436), 2021-11-26
Supplement: s1 [file s1]

### Internal Inhibition Scale

---

1. When it is wrong, I will correct it.
  2. I can review and reflect on myself when others criticize.
  3. I don't think it is easy for me to show good behavior.
  4. I am easily discouraged by failure.
  5. When I do something, I will first think about it.
  6. I lose my temper easily.
  7. I am often impulsive.
  8. I lack confidence in myself.
  9. I get upset when I do something wrong.
  10. I can concentrate on doing everything.
  11. I have some bad habits that can't be changed.
  12. When I am criticized for doing something wrong, I will be happy to reason with others.
  13. Under the teasing of others, I can do almost everything.
  14. When I encounter a problem, I like to wait and see if someone solves it.
  15. I like to do something exciting when I'm bored.
  16. I will do whatever it takes to beat others.
  17. I often make mistakes I made before.
  18. I don't think it's easy to concentrate on anything.
  19. Sometimes I really want to throw things.
  20. When I encounter difficulties, I feel helpless.
  21. I often lose my confidence because of the stimulation of others.
  22. When there is no supervision, I often cannot restrain my behavior.
  23. In unsatisfactory situations, I am able to accept the challenge courageously.
  24. When encountering setbacks, I can always find a way to solve the problem.
  25. When things go wrong, my emotions often become agitated or discouraged.
- 

The scores from low to high are (1-5): Strongly agree, Quite agree, Generally, Slightly agree, Disagree

---

### **Drug Craving Scale**

---

1. I can't do anything without taking drugs.
  2. If I stop taking drugs, my life will be depressed.
  3. I don't have enough capacity to stop taking drugs.
  4. I can't relax without drugs.
  5. I can't relieve my anxiety without taking drugs.
  6. Taking drugs can make people forget their worries temporarily.
  7. Drugs can satisfy curiosity.
  8. Taking drugs will give me a stimulating feeling.
  9. Taking drugs can relieve the feeling of injustice when being wronged.
  10. Drug use can enhance sexual performance.
  11. Drugs are a great way to refresh yourself.
  12. Drugs can relieve stress.
  13. I will take drugs all caused by others.
  14. I only smoke once and I shouldn't be addicted.
  15. As long as you don't let others find out, it's okay to take one or two mouthfuls.
  16. I will quit the drugs after another breath.
  17. The craving for drugs is a physiological response, so I can't resist it at all.
  18. If my craving for drugs cannot be satisfied, I will become more and more uncomfortable.
  19. The craving for drugs drives me crazy.
  20. I am always craving for drugs.
  21. I will continue to crave drugs for the rest of my life.
  22. I feel extremely uncomfortable physically when I cannot control my craving for drugs.
  23. The thirst for drugs is far greater than one's willpower.
  24. When I crave drugs, I can't control my thoughts and ideas at all.
  25. As long as I want to take drugs, I will definitely find drugs to use.
- 

The scores from low to high are (1-5): Strongly agree, Quite agree, Generally, Slightly agree, Disagree

---
